# Supplementary material for: Is there an effect of intranasal insulin on development and behaviour in Phelan-McDermid syndrome? A randomized, double-blind, placebo-controlled trial
Source: PubMed Central journal article supplement (PMC5117914; doi:10.1038/ejhg.2016.109), 2016-08-31
Supplement: ejhg2016109x1.pdf [file ejhg2016109x1.pdf]

## Supplement 1. Results of the intention-to-treat analysis for behavioural problems

### Methods

In addition to our primary and secondary objectives, we evaluated behavioural problems, which were assessed using two questionnaires: The Behavior Rating Inventory of Executive Function–Preschool Version (BRIEF-P) and the Child Behavior Checklist (CBCL/1.5-5). The BRIEF-P rates executive function problems within the context of the everyday environments<sup>1</sup>. The CBCL/1.5-5 covers an empirical range of behavioural, emotional and social function problems. We used the Dutch version of the CBCL/1.5-5 with international, multicultural norms<sup>2</sup>. Raw scores of both the BRIEF-P and CBCL/1.5-5 were converted in t-scores. A BRIEF-P t-score <60 is considered within the normal range, between 60 and 65 borderline clinical and >65 as clinical range. A CBCL/1.5-5 t-score <64 is considered within the normal range, between 65 en 69 borderline clinical and >70 as clinically relevant. A decrease in t-score represents a reduction of behavioural problems.

The effect of treatment was analysed by calculating the difference in Developmental Age Equivalents (DAEs) or t-scores (Brief-P and CBCL/1.5-5) between two consecutive assessments, each 6 months apart.

### Results

A limited reduction in t-scores was seen for the domains of inhibition, emotion regulation and attention and these reductions were neither clinically nor statistically significant (Table S1).

**Table S1: Results of the intention-to-treat analysis for behavioural problems**

|                         | Control Rate |        | Insulin Effect |        | Total Rate |                |
|-------------------------|--------------|--------|----------------|--------|------------|----------------|
|                         | C            | p      | C              | p      | C          | 95% CI         |
| B-P: Inhibition         | 0.53         | 0.59   | -1.97          | 0.07   | -1.44      | [-2.65; -0.24] |
| B-P: Flexibility        | -2.36        | 0.06   | 1.47           | 0.23   | -1.20      | [-2.36; 0.57]  |
| B-P: Emotion regulation | -0.37        | 0.77   | -0.19          | 0.87   | -0.56      | [-2.24; 1.12]  |
| B-F: Memory             | -1.89        | 0.06   | 0.63           | 0.52   | -1.26      | [-2.47; -0.05] |
| B-P: Planning           | -3.26        | 0.03   | 1.30           | 0.39   | -1.96      | [-3.83; -0.09] |
| C: Anxiety <sup>1</sup> | -0.80        | 0.09   | 0.36           | 0.44   | -0.44      | [-1.03; 0.15]  |
| C: Withdrawn            | -3.15        | <0.001 | 1.34           | <0.001 | -1.82      | [-2.95; -0.68] |
| C: Attention            | 0.04         | 0.97   | -1.17          | 0.21   | -1.13      | [-2.12; -0.14] |
| C: Aggression           | -1.18        | 0.07   | 0.23           | 0.70   | -0.95      | [-1.83; 0.08]  |

The coefficient (C) provides an estimate of the change in t-score in points per 6 months for the control period (Control Rate) and insulin period (Insulin effect). The p-value (p) is calculated for the difference between the DAE at the beginning and the end of these respective periods.  $p < 0.05$  is considered statistically significant. The confidence interval (CI) represents the distribution of the individual coefficients. B-P=BRIEF-P and C=CBCL1.5-5.

<sup>1</sup>The random coefficients model was reduced to a random intercept model since the variability in the slope was estimated to be zero.

### References

- 1 Gioia GA, Espy KA, Isquith PK. *Behavior Rating Inventory of Executive Function*. Psychological Assessment Resources: Odessa, FL, 2002.
- 2 ASEBA. Achenbach System of Eperically Based Assessment. [www.aseba.nl](http://www.aseba.nl).
